# Supplementary material for: Distinct Myocardial Transcriptomic Profiles of Cardiomyopathies Stratified by the Mutant Genes
Source: MDPI journal article supplement (doi:10.3390/genes11121430), 2020-11-28
Supplement: s1 [file s1]

**A Clinical data.** Clinical findings in patients with DCM and ARVC.

| Sample Number | Diagnosis            | Gender | Surgical Treatment (ST) | Age at ST (years) | NYHA | ICD | CI (L/min/m <sup>2</sup> ) | LVEDD (mm) | LVESD (mm) | FS (%) | LVEF (%) |
|---------------|----------------------|--------|-------------------------|-------------------|------|-----|----------------------------|------------|------------|--------|----------|
| 1             | DCM                  | m      | LVAD <sup>1</sup>       | 21                | 4    | +   | 1.74                       | 81         | 71         | 13     | 39       |
| 2             | DCM                  | m      | LVAD <sup>1</sup>       | 23                | 3-4  | -   | n.a.                       | 63         | 45         | n.a.   | 26       |
| 3             | ARVC                 | f      | HTx                     | 31                | 4    | +   | 1.48                       | 35         | 23         | 34     | 60       |
| 4             | DCM                  | m      | HTx                     | 32                | 3    | +   | 1.72                       | 70         | 65         | 7      | 20       |
| 5             | DCM                  | f      | HTx                     | 38                | 3    | +   | 2.13                       | 57         | 52         | 5      | 24       |
| 6             | DCM                  | f      | HTx                     | 33                | 3-4  | +   | 1.78                       | 60         | 52         | 13     | 25       |
| 7             | DCM                  | m      | HTx                     | 46                | 3-4  | +   | 1.85                       | 79         | 74         | 6      | 18       |
| 8             | DCM                  | m      | HTx                     | 44                | 4    | +   | 1.93                       | 71         | 67         | 5      | 16       |
| 9             | ARVC                 | m      | HTx                     | 51                | 4    | +   | 1.68                       | 42         | 32         | 23     | 56       |
| 10            | ARVC                 | m      | HTx                     | 49                | 4    | -   | 1.20                       | 64         | 59         | 12     | 22       |
| 11            | DCM                  | f      | HTx                     | 51                | 4    | +   | 1.60                       | 64         | 58         | 9      | 25       |
| 12            | DCM                  | m      | HTx                     | 40                | 4    | +   | 1.92                       | 67         | n.a.       | 9      | 23       |
| 13            | DCM                  | m      | HTx                     | 56                | 3    | +   | 1.55                       | 65         | 58         | 10     | 29       |
| 14            | DCM                  | f      | HTx                     | 48                | 3    | +   | 1.60                       | 60         | 50         | 17     | 22       |
| 15            | DCM                  | f      | HTx                     | 58                | 4    | +   | 2.44                       | 55         | 49         | 10     | 24       |
| 16            | DCM                  | m      | HTx                     | 53                | 3-4  | +   | 2.6                        | 64         | 56         | 12     | 31       |
| 17            | ARVC                 | m      | HTx                     | 60                | 3    | +   | 2.10                       | 46         | 35         | 20     | 55       |
| 18            | DCM                  | m      | HTx                     | 48                | 4    | -   | 2.99                       | 77         | 70         | 9      | 25       |
| 19            | DCM                  | m      | HTx                     | 59                | 4    | +   | 2.40                       | 69         | 65         | 6      | 16       |
| 20            | DCM                  | m      | HTx                     | 61                | 4    | +   | 2.06                       | 64         | 57         | 11     | 29       |
| 21            | ARVC                 | m      | HTx                     | 65                | 4    | +   | 2.09                       | 44         | 24         | 45     | 65       |
| 22            | DCM                  | m      | HTx                     | 62                | 4    | +   | 1.00                       | 59         | 49         | 17     | 15       |
| 23            | ARVC                 | m      | HTx                     | 63                | 4    | -   | 2.56                       | 45         | 34         | 24     | 57       |
| 24            | DCM                  | m      | HTx                     | 63                | 3    | +   | 3.20                       | 68         | 61         | 10     | 27       |
| 25            | DCM                  | f      | HTx                     | 69                | 4    | -   | 1.64                       | 71         | 64         | 10     | 27       |
| 26            | rejected donor heart | m      | organ removal           | 28                | n.a. | -   | n.a.                       | n.a.       | n.a.       | n.a.   | n.a.     |
| 27            | rejected donor heart | f      | organ removal           | 40                | n.a. | -   | n.a.                       | n.a.       | n.a.       | n.a.   | n.a.     |
| 28            | rejected donor heart | m      | organ removal           | 50                | n.a. | -   | n.a.                       | n.a.       | n.a.       | n.a.   | n.a.     |
| 29            | rejected donor heart | m      | organ removal           | 60                | n.a. | -   | n.a.                       | n.a.       | n.a.       | n.a.   | n.a.     |
| 30            | rejected donor heart | m      | organ removal           | 61                | n.a. | -   | n.a.                       | n.a.       | n.a.       | n.a.   | n.a.     |
| 31            | rejected donor heart | f      | organ removal           | 64                | n.a. | -   | n.a.                       | n.a.       | n.a.       | n.a.   | n.a.     |

Abbreviations: CI = cardiac index, f = female, FS = fractional shortening, HTx = heart transplantation, ICD = implantable cardioverter defibrillator, LVAD = left ventricular assist device, LVEDD=left ventricular end-diastolic diameter, LVEF=left ventricular ejection fraction, LVESD = left ventricular end-systolic dimension, m = male, n.a. = not assessed, NYHA = New York Heart Association functional classification of heart failure, <sup>1</sup>=pre-VAD, NYHA classification and echocardiographic data were not available for rejected donor hearts as these data are not acquired before organ removal.

**B Variants of DCM and ARVC patients.** *RBM20*, *LMNA*, *TTN* and *PKP2* gene mutations in DCM and ARVC patients. For each investigated patient, sample number, patient id, affected gene, nucleotide change, rs number (if available), chromosome and position of the variant in the GRCh38 assembly are shown.

| Sample number | Kind of CM | Affected gene | Nucleotide change      | Reference SNP number | Chromosome | Position (GRCh38)   | Mutation DNA change (ACMG, class4-5) | Mutation protein change (ACMG, class4-5) | ACMG | ACMG-Criteria                          | Minor allele frequency | Type                 |
|---------------|------------|---------------|------------------------|----------------------|------------|---------------------|--------------------------------------|------------------------------------------|------|----------------------------------------|------------------------|----------------------|
| 1             | DCM        | <i>RBM20</i>  | C>T                    | rs267607003          | 10         | 110812310           | c.1913C>A                            | p.P638L                                  | 5    | PS1, PS3, PS4, PM1, PM2, PP1, PP3, PP4 | 0                      | missense             |
| 2             | DCM        | <i>TTN</i>    | A>T                    |                      | 2          | 178575127           | c.71005A>T                           | p.K23669X                                | 4    | PVS1, PM2, PP4                         | 0                      | nonsense             |
| 3             | ARVC       | <i>PKP2</i>   | G>C                    | rs193922674          | 12         | 32802557            | c.2146-1G>C                          | unknown                                  | 4    | PVS1, PM2, PP4                         | 0.00003184             | Splice site mutation |
| 4             | DCM        | <i>RBM20</i>  | C>T                    | rs267607003          | 10         | 110812310           | c.1913C>A                            | p.P638L                                  | 5    | PS1, PS3, PS4, PM1, PM2, PP1, PP3, PP4 | 0                      | missense             |
| 5             | DCM        | <i>TTN</i>    | delA                   |                      | 2          | 178741762           | c.11483delA                          | p.N3828MfsX4                             | 4    | PVS1, PM2, PP4                         | 0                      | deletion, frameshift |
| 6             | DCM        | <i>LMNA</i>   | delCAAGCTGG-CCCTGGACAT |                      | 1          | 156136059           | c.1095_1112delCAAGCTGGCCCTGGACAT     | p.I365_D370del                           | 4    | PM1, PM2, PM4, PP4                     | 0                      | in-frame deletion    |
| 7             | DCM        | <i>TTN</i>    | delTG                  |                      | 2          | 178633448           | c.42909_42910delTG                   | p.C14303WfsX12                           | 4    | PVS1, PM2, PP4                         | 0                      | deletion, frameshift |
| 8             | DCM        | <i>RBM20</i>  | T>C                    | rs794729154          | 10         | 110821360           | c.2741T>C                            | p.V914A                                  | 4    | PS3, PM2, PP1, PP4                     | 0                      | missense             |
| 9             | ARVC       | <i>PKP2</i>   | T>A                    |                      | 12         | 32822499            | c.1939_1961del23                     | p.C647fsX88                              | 4    | PVS1, PM2, PP4                         | 0.00003184             | Deletion, frameshift |
| 10            | ARVC       | <i>PKP2</i>   | G>C                    | rs193922674          | 12         | 32802557            | c.2146-1G>C                          | unknown                                  | 4    | PVS1, PM2, PP4                         | 0.00003184             | Splice site mutation |
| 11            | DCM        | <i>LMNA</i>   | delCT                  | rs59684335           | 1          | 156135280-156135285 | c.904_905CT                          | p.S303CfsX27                             | 5    | PVS1, PS3, PM2, PP4                    | 0                      | deletion, frameshift |
| 12            | DCM        | <i>TTN</i>    | T>G                    |                      | 2          | 178533512           | c.103103T>G                          | p.L34368X                                | 4    | PVS1, PM2, PP4                         | 0                      | nonsense             |
| 13            | DCM        | <i>LMNA</i>   | C>T                    | rs267607601          | 1          | 156115024           | c.106C>T                             | p.Q36X                                   | 4    | PVS1, PM2, PP4                         | 0                      | nonsense             |
| 14            | DCM        | <i>LMNA</i>   | C>T                    | rs59026483           | 1          | 156134457           | c.568C>T                             | p.R190W                                  | 5    | PS1, PS3, PM1, PM2, PP3, PP4           | 0                      | missense             |
| 15            | DCM        | <i>LMNA</i>   | C>T                    | rs267607554          | 1          | 156135925           | c.961C>T                             | p.R321X                                  | 5    | PVS1, PS3, PM2, PP4                    | 0                      | nonsense             |
| 16            | DCM        | <i>RBM20</i>  | C>G                    | rs1114167331         | 10         | 110812301           | c.1904C>G                            | p.S635C                                  | 5    | PS3, PM1, PM2, PM5, PP1, PP3, PP4      | 0                      | missense             |

|    |      |             |       |              |    |                     |             |               |   |                              |             |                       |
|----|------|-------------|-------|--------------|----|---------------------|-------------|---------------|---|------------------------------|-------------|-----------------------|
| 17 | ARVC | <i>PKP2</i> | C>T   | rs886041322  | 12 | 32878222            | c.658C>T    | p.Q220X       | 4 | PVS1, PM2, PP4               | 0           | Nonsense              |
| 18 | DCM  | <i>TTN</i>  | C>T   | rs72646828   | 2  | 178598904           | c.56806C>T  | p.R18936X     | 4 | PVS1, PM2, PP4               | 0.000004037 | nonsense              |
| 19 | DCM  | <i>TTN</i>  | G>A   |              | 2  | 178573100           | c.73032G>A  | p.W24344X     | 4 | PVS1, PM2, PP4               | 0           | nonsense              |
| 20 | DCM  | <i>TTN</i>  | C>G   | rs1114167324 | 2  | 178590043           | c.61682C>G  | p.S20561X     | 4 | PVS1, PM2, PP4               | 0           | nonsense              |
| 21 | ARVC | <i>PKP2</i> | delCT | rs794729129  | 12 | 32824048            | c.1803delC  | p.D601EfsX655 | 4 | PVS1, PM2, PP4               | 0.00003185  | Deletion, frameshift  |
| 22 | DCM  | <i>LMNA</i> | G>A   | rs28933093   | 1  | 156130741           | c.481G>A    | p.E161K       | 5 | PS1, PS3, PM1, PM2, PP3, PP4 | 0           | missense              |
| 23 | ARVC | <i>PKP2</i> | C>T   | rs1325285497 | 12 | 32802526            | c.2176C>T   | p.Q726X       | 4 | PVS1, PM2, PP4               | 0           | Nonsense              |
| 24 | DCM  | <i>TTN</i>  | A>T   |              | 2  | 178575127           | c.71005A>T  | p.Lys23669Ter | 4 | PVS1, PM2, PP4               | 0           | nonsense              |
| 25 | DCM  | <i>TTN</i>  | insA  | rs1440081449 | 2  | 178581636-178581637 | c.66632dupA | p.N22211KfsX8 | 4 | PVS1, PM2, PP4               | 0           | insertion, frameshift |

Minor allele frequency according to the Genome Aggregation Database (gnomAD, <https://gnomad.broadinstitute.org/>), 2020-04-03.

Used NM- or NP-numbers are NM\_001134363.3 or NP\_001127835.2 for *RBM20*, NM\_170707.4 or NP\_733821.1 for *LMNA*, NM\_001267550.1 or NP\_001254479.1 for *TTN* and NM\_001005242.3 or NP\_004563.2 for *PKP2*.

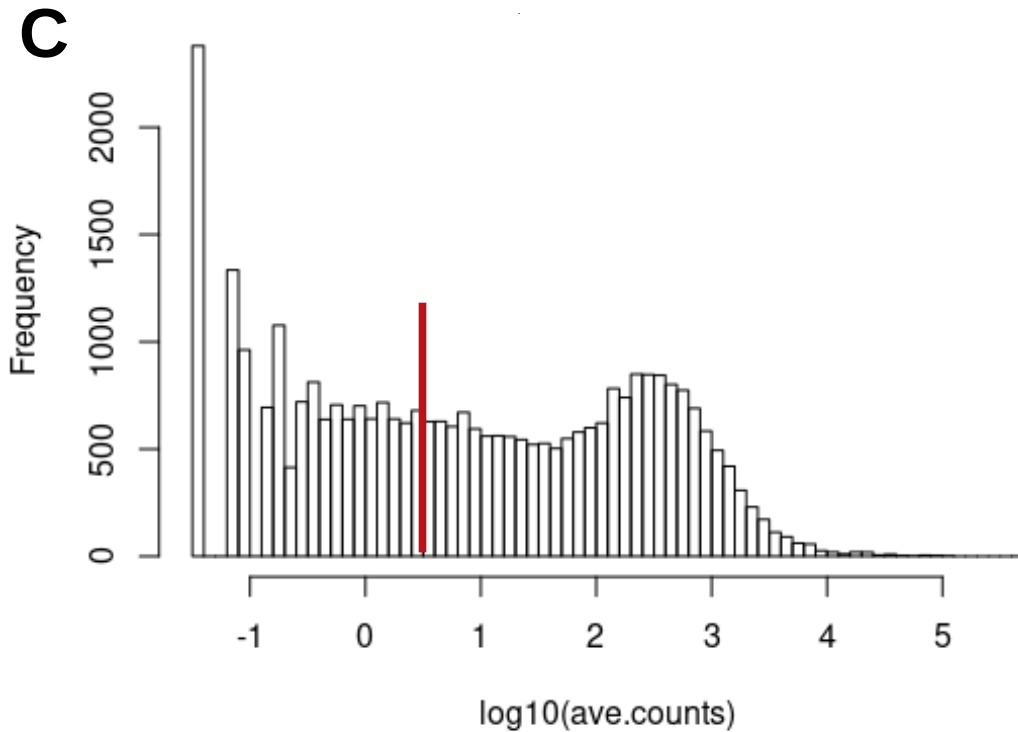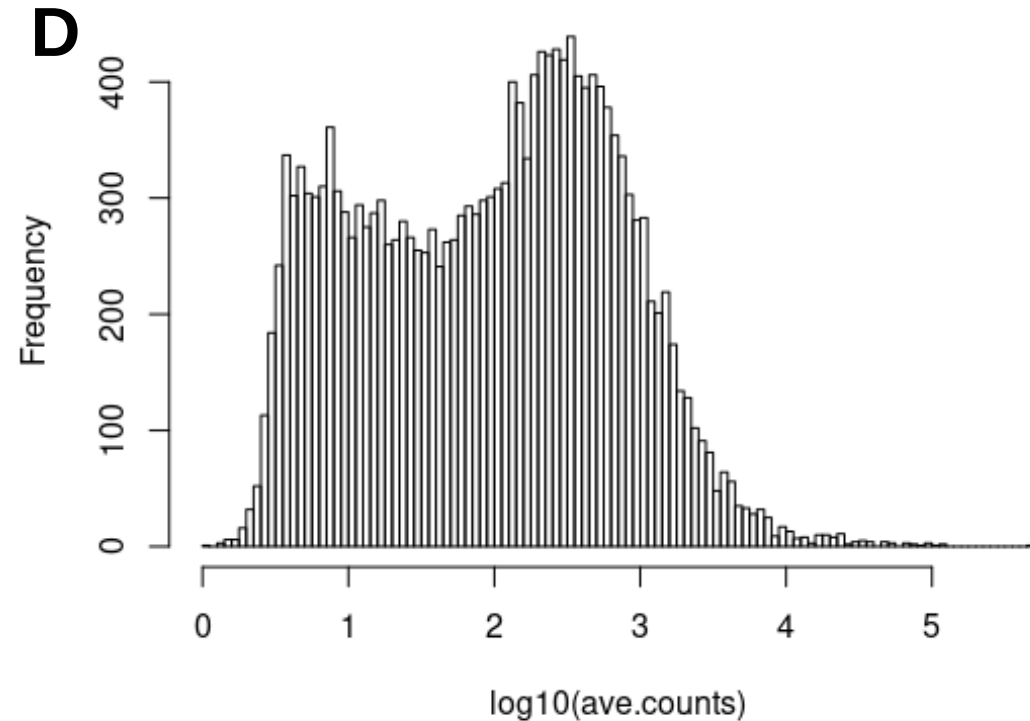

**Figure S1, C+D:** Histogram of log-mean counts for all genes before (C) and after (D) the cutoff (red line). Only genes with a mean count greater than 4 ( $\log_{10}(4) \approx 0.6$ ) in at least one condition were considered for further analysis. For genes below this cutoff it is difficult to distinguish real expression from measurement errors and sequencing noise.

**E**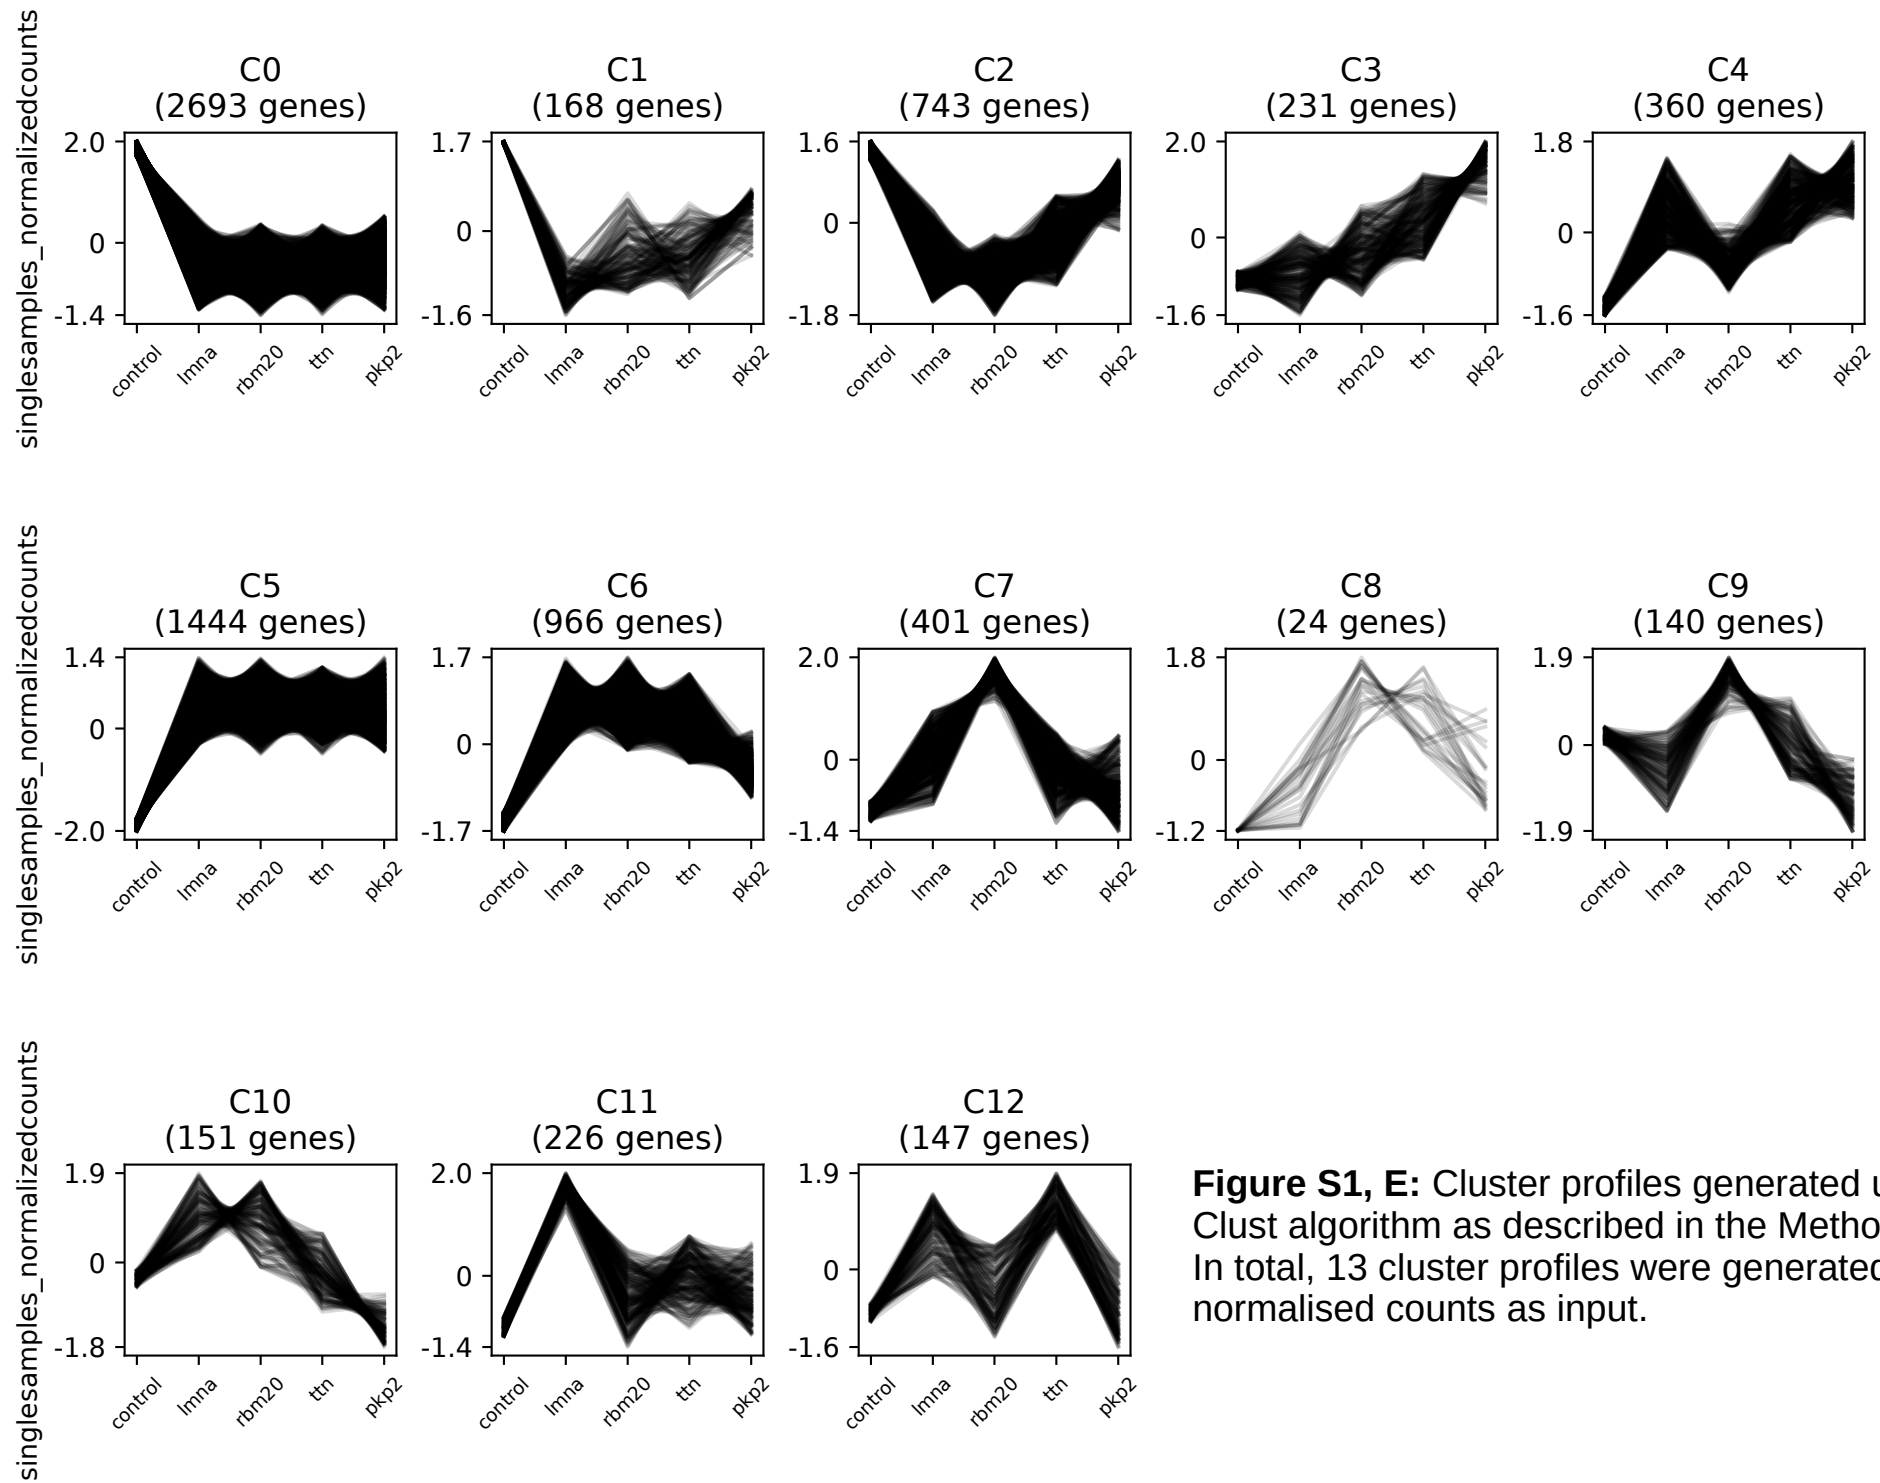

**Figure S1, E:** Cluster profiles generated using the Clust algorithm as described in the Method section. In total, 13 cluster profiles were generated using the normalised counts as input.
